# Supplementary material
Source: Springer Nature journal article supplement (https://www.springermedizin.de/resource/supplementary/12974_2010_278_MOESM6_ESM.pdf/9601148)

Nuclear NF- $\kappa$ B Expression  
(% Over Control)

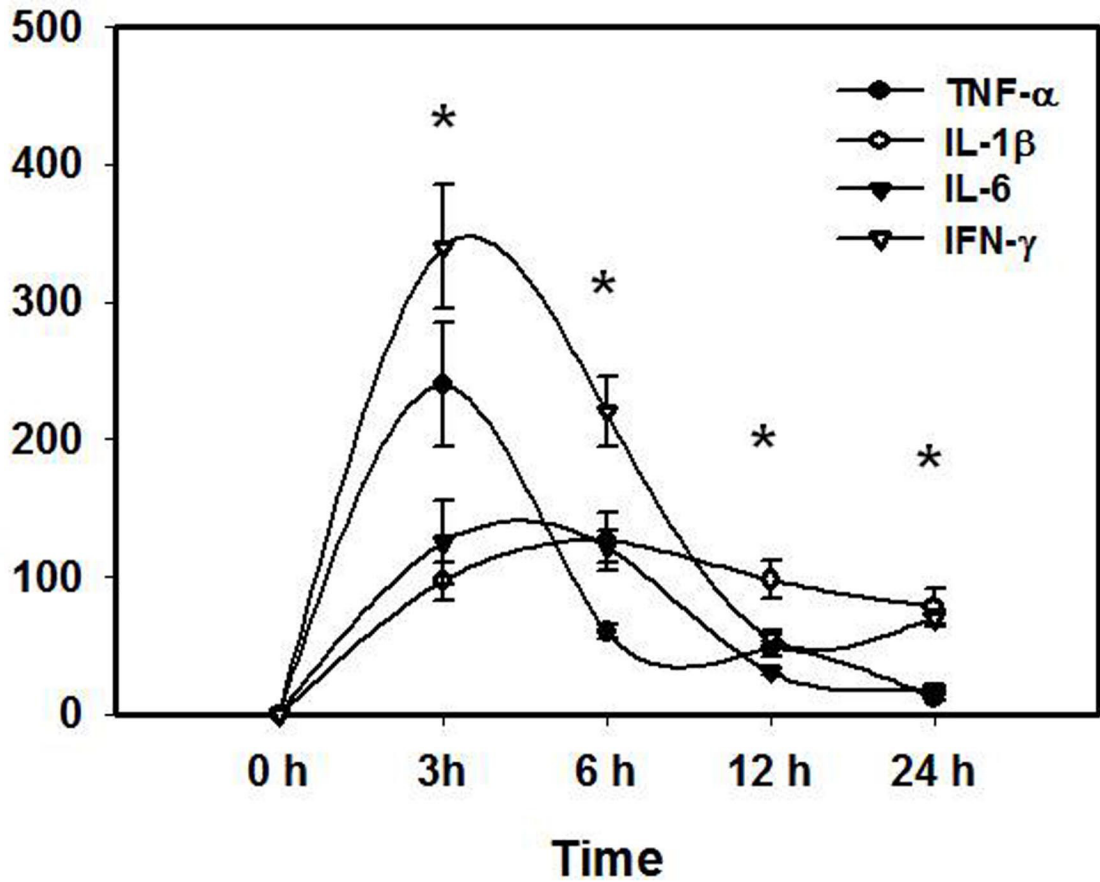

Supplement: MOESM6 [file 9601148]
